# Supplementary material
Source: Springer Nature journal article supplement (https://www.springermedizin.de/resource/supplementary/12958_2009_528_MOESM2_ESM.pdf/9568218)

**PLAP****ER $\beta$ 1****ER $\beta$ 2****Seminoma**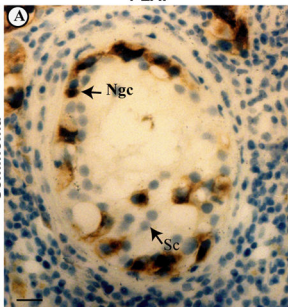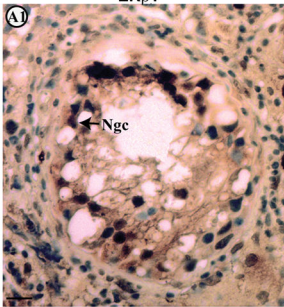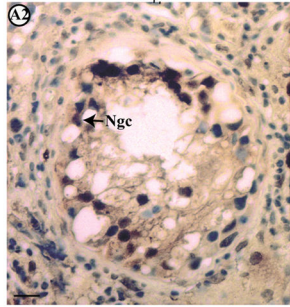**Embryonal Carcinoma**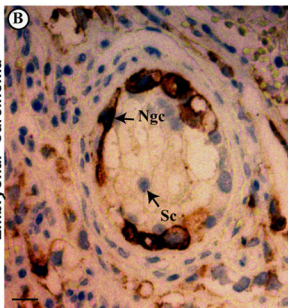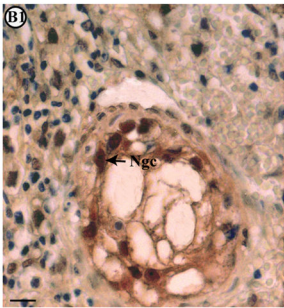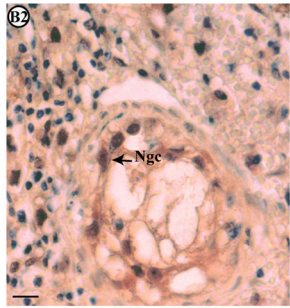

Supplement: MOESM2 [file 9568218]
